# Supplementary material for: Host PTX3 Protein and Bacterial Capsule Coordinately Regulate the Inflammatory Response during Streptococcus suis Infection
Source: MDPI journal article supplement (doi:10.3390/vetsci10030239), 2023-03-22
Supplement: s1 [file s1]

## Supplementary

## File

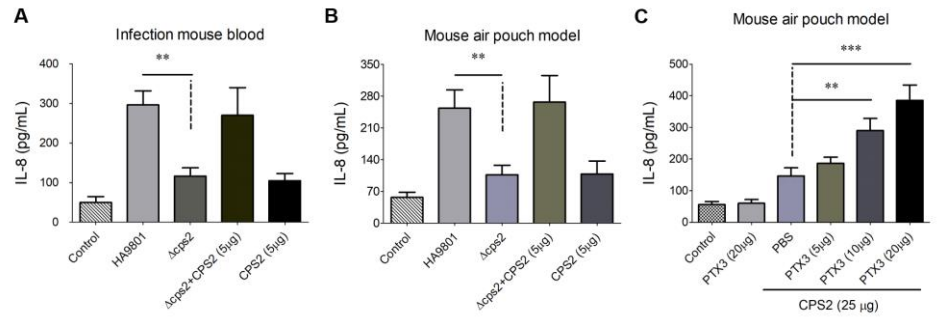

**Figure S1. PTX3 facilitated CPS2 to trigger the release of cytokine IL-8 during the infection of SS2 HA9801.** CPS2 contributed to the inflammatory response during SS infection in the mouse systemic infection model (A) and mouse air pouch model (B). (C) The release of cytokine IL-8 was activated by the co-treatment of CPS2 (25  $\mu$ g) and PTX3 protein (5, 10, or 20  $\mu$ g) in the mouse air pouch model. The statistical significance was calculated by two-tailed unpaired Student's *t*-tests (\*\*  $P < 0.01$ ; \*\*\*  $P < 0.001$ ).
